# Supplementary material
Source: PubMed Central journal article supplement (PMC3484945)
Supplement: 10.3163.1536-5050.100.4.013.sg001.pdf [file 10.3163.1536-5050.100.4.013.sg001.pdf]

**“Genomics and Translational Medicine for Information Professionals”: an innovative course to educate the next generation of librarians**

**Ana D. Cleveland, PhD, AHIP; Kristi L. Holmes, PhD; Jodi L. Philbrick, PhD**

**Table 2**

Required core readings

- Beaudoin DE, Longo N, Logan RA, Jones JP, Mitchell JA. Using information prescriptions to refer patients with metabolic conditions to the Genetics Home Reference website. *J Med Lib Assoc.* 2011 Jan;99(1):70–6. DOI: <http://dx.doi.org/10.3163/1536-5050.99.1.012>.
- Berryman DR. Learning to drive: developing a workable awareness plan for monitoring new technology. *Med Ref Serv Q.* 2010 Apr;29(2):166–74.
- Cheek FM. Research support in an academic medical center. *Med Ref Serv Q.* 2010 Jan;29(1):37–46.
- Farber GK, Weiss L. Core facilities: maximizing the return on investment. *Sci Transl Med.* 2011 Aug 10;3(95):95cm21.
- Ferree N, Schaefer N, Butson LC, Tennant MR. Liaison librarian tiers: levels of service. *J Med Lib Assoc.* 2009 Apr;97(2):145–8. DOI: <http://dx.doi.org/10.3163/1536-5050.97.2.015>.
- Haines LL, Light J, O'Malley D, Delwiche FA. Information-seeking behavior of basic science researchers: implications for library services. *J Med Lib Assoc.* 2010 Jan;98(1):73–81. DOI: <http://dx.doi.org/10.3163/1536-5050.98.1.019>.
- Holmes KL, Dubinsky EK. Integration of Web 2.0 technologies in the translational research environment. *Med Ref Serv Q.* 2009 Oct;28(4):309–35.
- Landau R. Solo librarian and outreach to hospital staff using Web 2.0 technologies. *Med Ref Serv Q.* 2010 Jan;29(1):75–84.
- Loud JT. Direct-to-consumer genetic and genomic testing: preparing nurse practitioners for genomic healthcare. *J Nurse Pract.* 2010 Sep 1;6(8):585–94.
- Maietta C, Bullock SH. A value-added partnership between a chief learning officer and a medical librarian. *Med Ref Serv Q.* 2009 Oct;28(4):375–84.
- McCarty CA, Chisholm RL, Chute CG, Kullo IJ, Jarvik GP, Larson EB, Li R, Masys DR, Ritchie MD, Roden DM, Struewing JP, Wolf WA; eMERGE Team. The eMerge network: a consortium of biorepositories linked to electronic medical records data for conducting genomic studies. *BMC Med Genomics.* 2011 Jan 26;4(13).
- Rambo N. E-science and biomedical libraries [editorial]. *J Med Lib Assoc.* 2009 Jul;97(3):159–61. DOI: <http://dx.doi.org/10.3163/1536-5050.97.3.001>.
- Sansone SA, Rocca-Serra P, Field D, Maguire E, Taylor C, Hofmann O, Fang H, Neumann S, Tong W, Amaral-Zettler L, Begley K, Booth T, Bougueleret L, Burns G, Chapman B, Clark T, Coleman LA, Copeland J, Das S, de Daruvar A, de Matos P, Dix I, Edmunds S, Evelo CT, Forster MJ, Gaudet P, Gilbert J, Goble C, Griffin JL, Jacob D, Kleinjans J, Harland L, Haug K, Hermjakob H, Ho Sui SJ, Laederach A, Liang S, Marshall S, McGrath A, Merrill E, Reilly D, Roux M, Shamu CE, Shang CA, Steinbeck C, Trefethen A, Williams-Jones B, Wolstencroft K, Xenarios I, Hide W. Toward interoperable bioscience data. *Nat Genet.* 2012 Jan 27;44(2):121–6.
- Sarli CC, Dubinsky EK, Holmes KL. Beyond citation analysis: a model for assessment of research impact. *J Med Lib Assoc.* 2010 Jan;98(1):17–23. DOI: <http://dx.doi.org/10.3163/1536-5050.98.1.008>.

- Sayers EW, Barrett T, Benson DA, Bolton E, Bryant SH, Canese K, Chetvernin V, Church DM, Dicuccio M, Federhen S, Feolo M, Fingerhman IM, Geer LY, Helmberg W, Kapustin Y, Krasnov S, Landsman D, Lipman DJ, Lu Z, Madden TL, Madej T, Maglott DR, Marchler-Bauer A, Miller V, Karsch-Mizrachi I, Ostell J, Panchenko A, Phan L, Pruitt KD, Schuler GD, Sequeira E, Sherry ST, Shumway M, Sirotkin K, Slotta D, Souvorov A, Starchenko G, Tatusova TA, Wagner L, Wang Y, Wilbur WJ, Yaschenko E, Ye J. Database resources of the National Center for Biotechnology Information. *Nucleic Acids Res.* 2012 Jan;40(database issue):D13–25.
  - Shipman JP, Kurtz-Rossi S, Funk CJ. The Health Information Literacy Research Project. *J Med Lib Assoc.* 2009 Oct;97(4):293–301. DOI: <http://dx.doi.org/10.3163/1536-5050.97.4.014>
-
